# Supplementary material for: Highly efficient and stable inverted perovskite solar cells using down-shifting quantum dots as a light management layer and moisture-assisted film growth
Source: Royal Society of Chemistry journal article supplement (doi:10.1039/c9ta03131f), 2019-01-01
Supplement: c9ta03131f1.pdf [file c9ta03131f1.pdf]

## Supporting Information

### Highly Efficient and Stable Inverted Perovskite Solar Cells Using Down-Shifting Quantum Dots as a Light Management Layer and Moisture-Assisted Film Growth

Mohammad Mahdi Tavakoli,<sup>1,2\*</sup> Hadi Tavakoli Dastjerdi,<sup>3</sup> Daniel Prochowicz,<sup>4</sup> Pankaj Yadav,<sup>5</sup>  
Rouhollah Tavakoli,<sup>1</sup> Michael Saliba<sup>6</sup>, Zhiyong Fan<sup>7,8\*</sup>

<sup>1</sup>*Department of Materials Science and Engineering, Sharif University of Technology, 14588 Tehran, Iran.*

<sup>2</sup>*Department of Electrical Engineering and Computer Science, Massachusetts Institute of Technology, Cambridge, MA 02139, USA*

<sup>3</sup>*Department of Materials Science and Engineering, Massachusetts Institute of Technology, Cambridge, MA 02139, USA*

<sup>4</sup>*Institute of Physical Chemistry, Polish Academy of Sciences, Kasprzaka 44/52, 01-224 Warsaw, Poland*

<sup>5</sup>*Department of Solar Energy, School of Technology, Pandit Deendayal Petroleum University, Gandhinagar-382 007, Gujarat, India*

<sup>6</sup>*Adolphe Merkle Institute, Chemins des Verdiers 4, CH-1700 Fribourg*

<sup>7</sup>*Department of Electronic and Computer Engineering, The Hong Kong University of Science and Technology, Clear Water Bay, Kowloon, Hong Kong SAR, China*

<sup>8</sup>*HKUST-Shenzhen Research Institute, No. 9 Yuexing first RD, South Area, Hi-tech Park, Nanshan, Shenzhen 518057, China*

\* Corresponding authors: [mtavakol@mit.edu](mailto:mtavakol@mit.edu); [eezfan@ust.hk](mailto:eezfan@ust.hk)

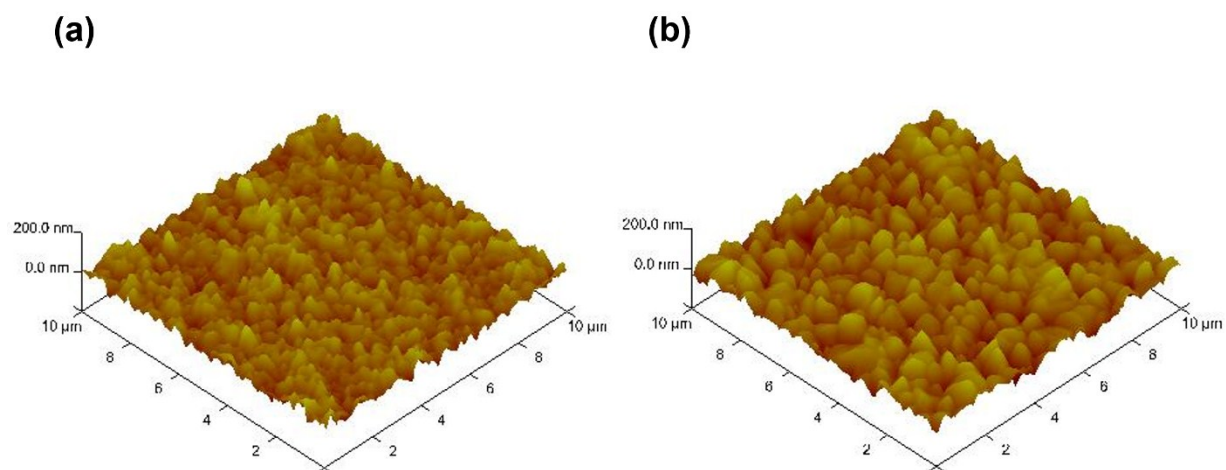

**Figure S1.** Three-dimensional AFM images of perovskite films annealed inside the glovebox (a) and (b) ambient air.

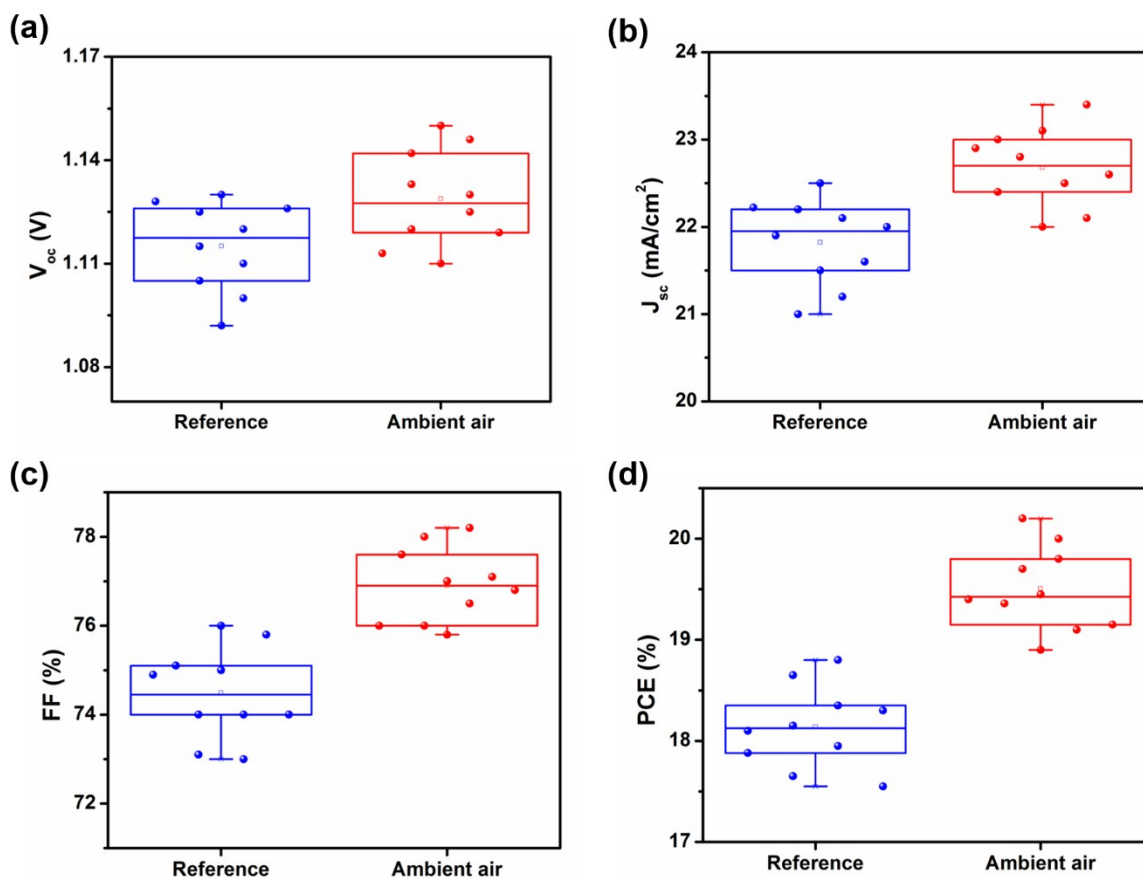

**Figure S2.** Statistic of the photovoltaic parameters for the PSC devices annealed in nitrogen glovebox (n = 10) and ambient air (n = 10).

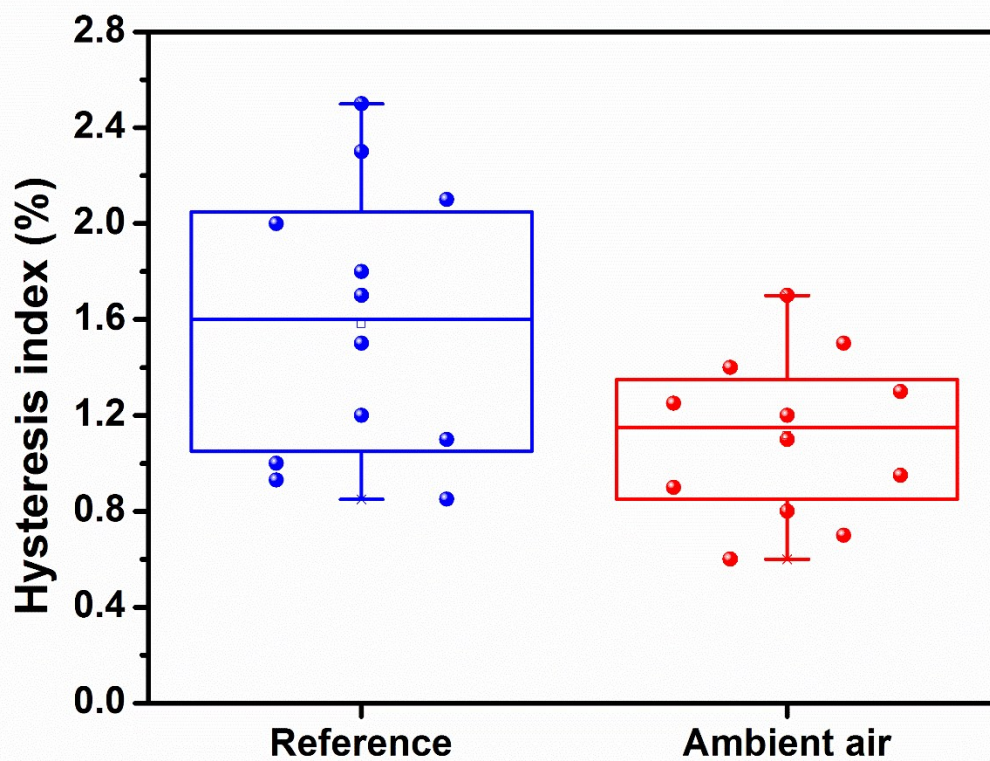

**Figure S3.** Statistic of hysteresis indices for the PSC devices annealed in nitrogen glovebox ( $n = 12$ ) and ambient air ( $n = 12$ ).

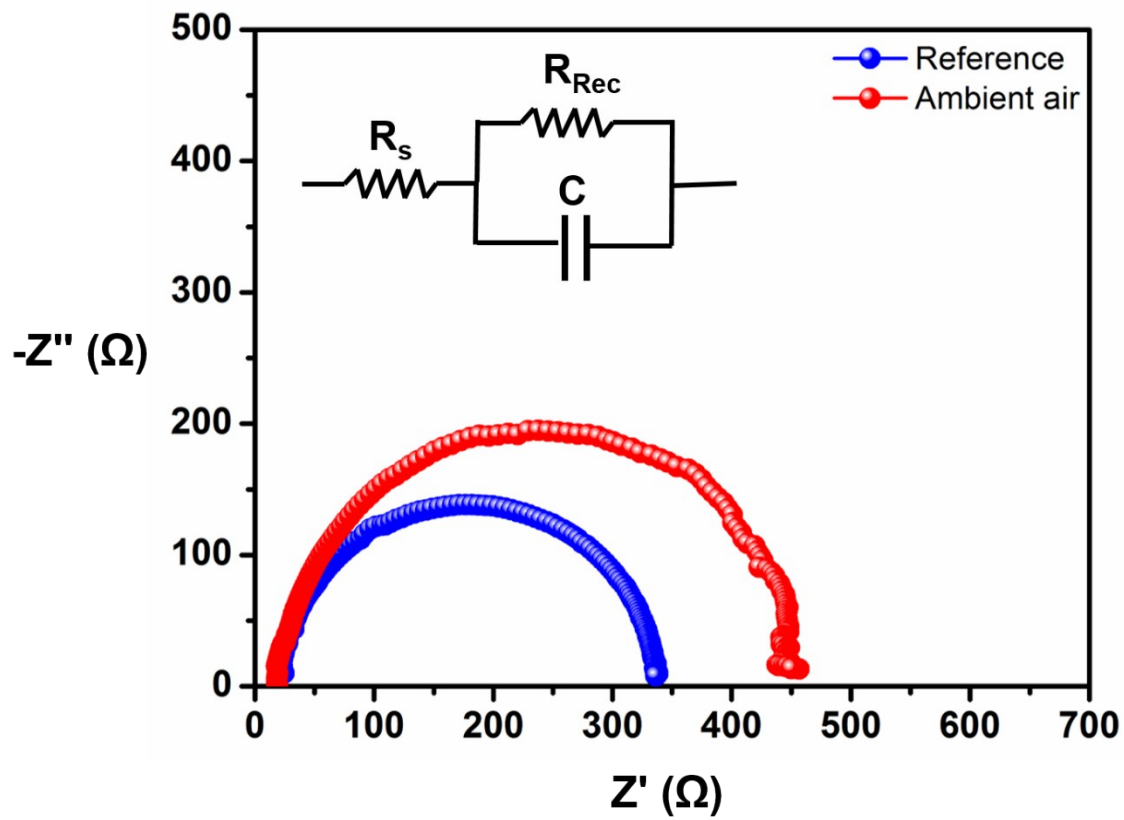

**Figure S4.** Nyquist plots of the reference device and modified PSC by annealing the perovskite film in ambient air under dark condition.

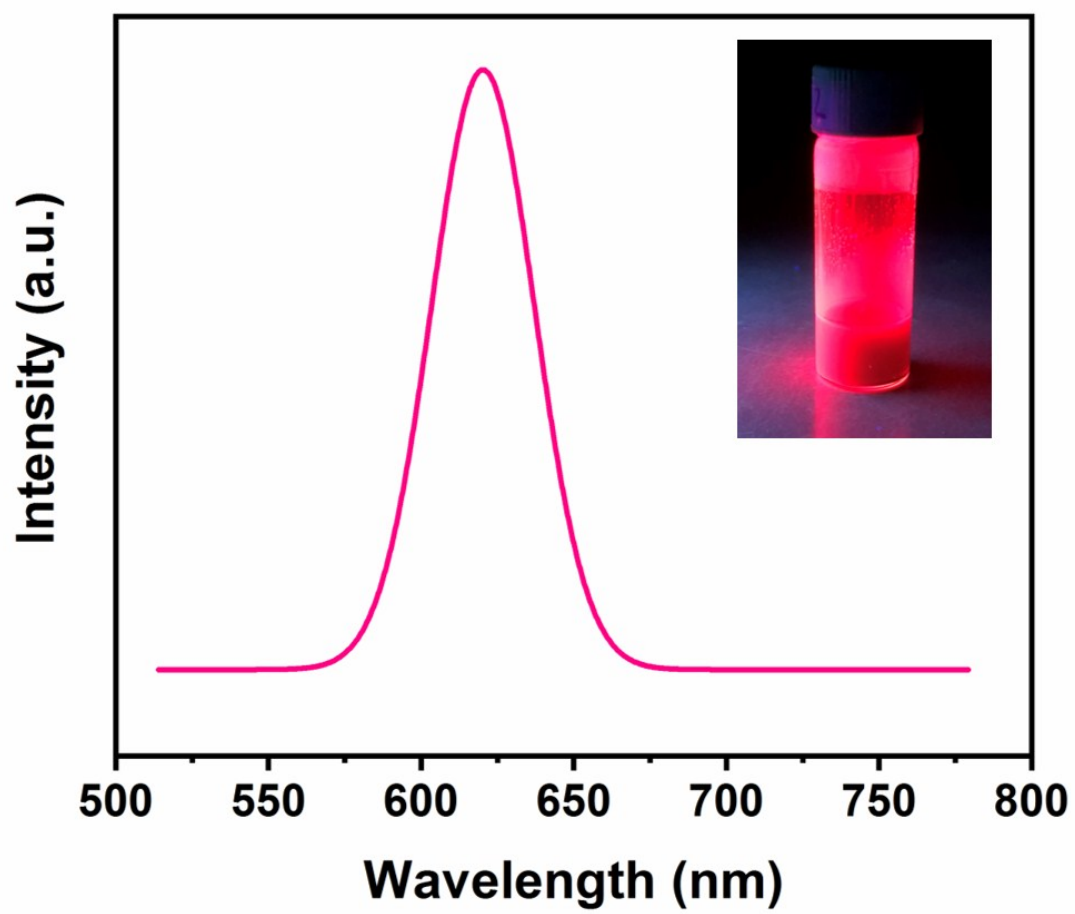

**Figure S5.** PL emission for a thin layer of CdSe/CdS QDs deposited on glass.

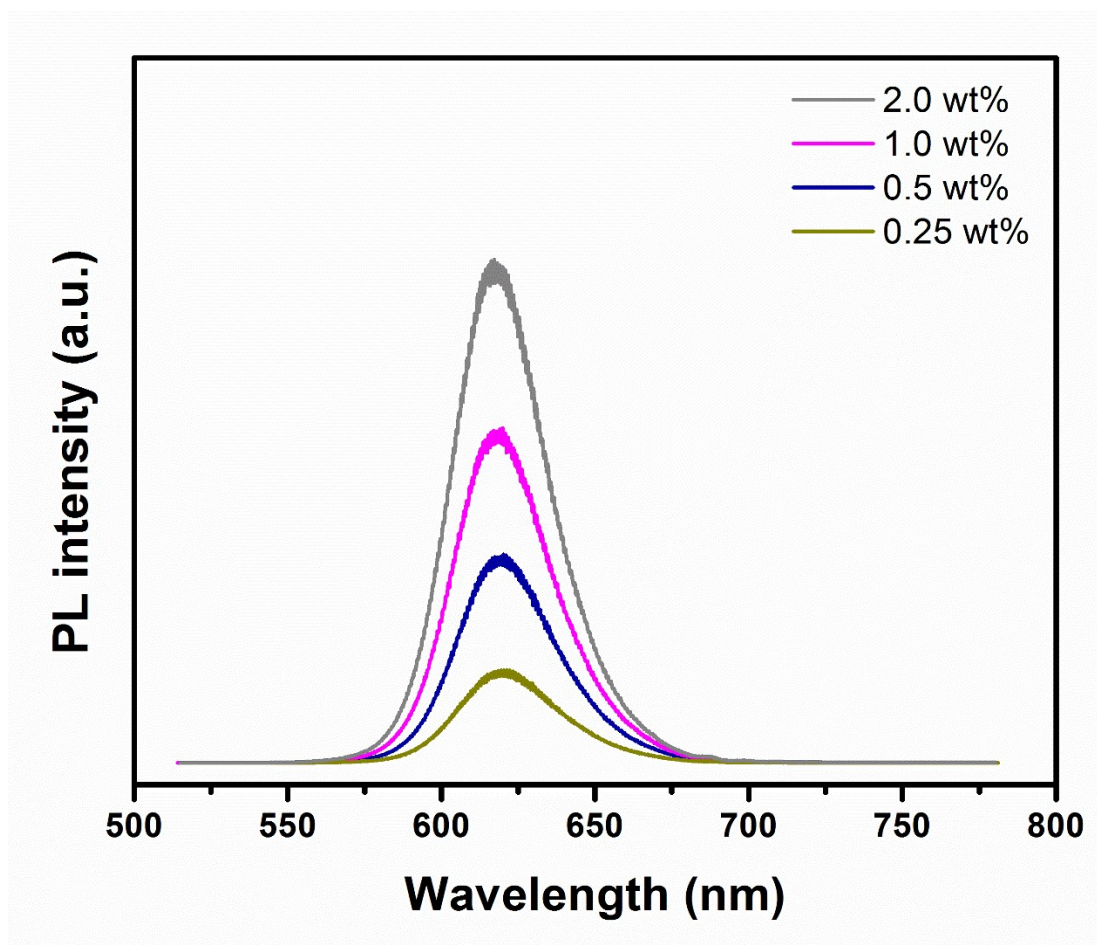

**Figure S6.** PL emission of the CdSe/CdS QDs layers with different thicknesses deposited on glass substrates.

**Table S1.** Fitting parameters of the TRPL measurement for the perovskite samples deposited on glass

| Sample      | $A_1$ | $\tau_1$ (ns) | $A_2$ | $\tau_2$ (ns) | $A_3$ | $\tau_3$ (ns) |
|-------------|-------|---------------|-------|---------------|-------|---------------|
| Reference   | 0.164 | 3.39          | 0.3   | 24.1          | 0.56  | 78.75         |
| Ambient air | 0.049 | 7.36          | 0.384 | 68.74         | 0.52  | 179.7         |

**Table S2.** Figures of merit for the PSC devices including down-shifting layers with different concentrations (These data are the average value of 10 PSC devices)

| Concentration (wt%) | $V_{oc}$ (mV)  | $J_{sc}$ (mA/cm <sup>2</sup> ) | FF (%)          | PCE (%)          |
|---------------------|----------------|--------------------------------|-----------------|------------------|
| <b>0</b>            | <b>1130±17</b> | <b>22.7±0.4</b>                | <b>77±1.1</b>   | <b>19.4±0.7</b>  |
| <b>0.25</b>         | <b>1130±15</b> | <b>22.8±0.4</b>                | <b>77±1.2</b>   | <b>19.75±0.7</b> |
| <b>0.5</b>          | <b>1130±17</b> | <b>22.9±0.5</b>                | <b>77±1.3</b>   | <b>19.86±0.7</b> |
| <b>1.0</b>          | <b>1131±16</b> | <b>23±0.6</b>                  | <b>77.1±1.3</b> | <b>19.9±0.8</b>  |
| <b>2.0</b>          | <b>1131±18</b> | <b>22.3±0.3</b>                | <b>76±1.2</b>   | <b>19.1±0.6</b>  |
